# Supplementary material
Source: PubMed Central journal article supplement (PMC10226054)
Supplement: sj-pdf-1-bji-10.1177_17571774211060423.pdf [file sj-pdf-1-bji-10.1177_17571774211060423.pdf]

Supplemental Table 1. Indications for and providers ordering a female external urinary collection device

| <b>Characteristic</b>                            | <b>POST<br/>(n=292)</b> |
|--------------------------------------------------|-------------------------|
| <b>Indication for catheterization, n (%)</b>     |                         |
| Strict ins/outs                                  | 167 (57.2%)             |
| Incontinence                                     | 63 (21.6%)              |
| Urinary retention                                | 39 (13.4%)              |
| Management of immobilized patient                | 12 (4.1%)               |
| Comfort                                          | 10 (3.4%)               |
| <b>Provider service ordering catheter, n (%)</b> |                         |
| Medicine                                         | 233 (79.8%)             |
| Neurology                                        | 43 (14.7%)              |
| Family medicine                                  | 14 (4.8%)               |
| Emergency medicine                               | 2 (0.7%)                |
