# Supplementary material
Source: PubMed Central journal article supplement (PMC10226054)
Supplement: sj-pdf-2-bji-10.1177_17571774211060423.pdf [file sj-pdf-2-bji-10.1177_17571774211060423.pdf]

Supplemental Table 2. Infectious characteristics of female external urinary collection device patients.

| <b>Characteristic</b>                                          | <b>POST<br/>(n=292)</b> |
|----------------------------------------------------------------|-------------------------|
| First organism of CAUTI or PAUTI, n (%)                        |                         |
| E. coli                                                        | 8 (53.3%)               |
| Proteus mirabilis                                              | 3 (20.0%)               |
| Other                                                          | 2 (13.3%)               |
| Enterococcus species                                           | 1 (6.7%)                |
| Klebsiella species                                             | 1 (6.7%)                |
| Predominant organism of UTI, n (%)                             |                         |
| E. coli                                                        | 33 (55.9%)              |
| Other                                                          | 9 (15.3%)               |
| Klebsiella species                                             | 6 (10.2%)               |
| Enterococcus species                                           | 5 (8.5%)                |
| Proteus mirabilis                                              | 3 (5.1%)                |
| P. aeruginosa                                                  | 2 (3.4%)                |
| Antibiotic use in 72 hours prior to CAUTI/UTI, n (%)           | 4 (5.6%)                |
| Time from catheter placement to CAUTI/UTI, hours, median (IQR) | 0 (0, 19)               |

CAUTI = catheter-associated urinary tract infection, UTI = urinary tract infection
