# Supplementary material
Source: PubMed Central journal article supplement (PMC10226054)
Supplement: sj-pdf-3-bji-10.1177_17571774211060423.pdf [file sj-pdf-3-bji-10.1177_17571774211060423.pdf]

Supplemental Table 3. Complications in female patients with external urinary collection devices admitted to a medical service.

| <b>Complication</b>           | <b>POST<br/>(n=292)</b> |
|-------------------------------|-------------------------|
| Acute renal failure, n (%)    | 47 (16.1%)              |
| DVT, n (%)                    | 12 (4.1%)               |
| Pulmonary embolism, n (%)     | 5 (1.7%)                |
| C. difficile infection, n (%) | 1 (0.3%)                |

*DVT = deep vein thrombosis*
